# Supplementary material for: Effects of veverimer on serum bicarbonate and physical function in women with chronic kidney disease and metabolic acidosis: a subgroup analysis from a randomised, controlled trial
Source: Springer Nature journal article supplement (doi:10.1186/s12882-022-02690-1), 2022-02-25
Supplement: MOESM1 [file 20171198]

## SUPPLEMENTAL MATERIALS

**Supplemental Figure 1. Overall study design**

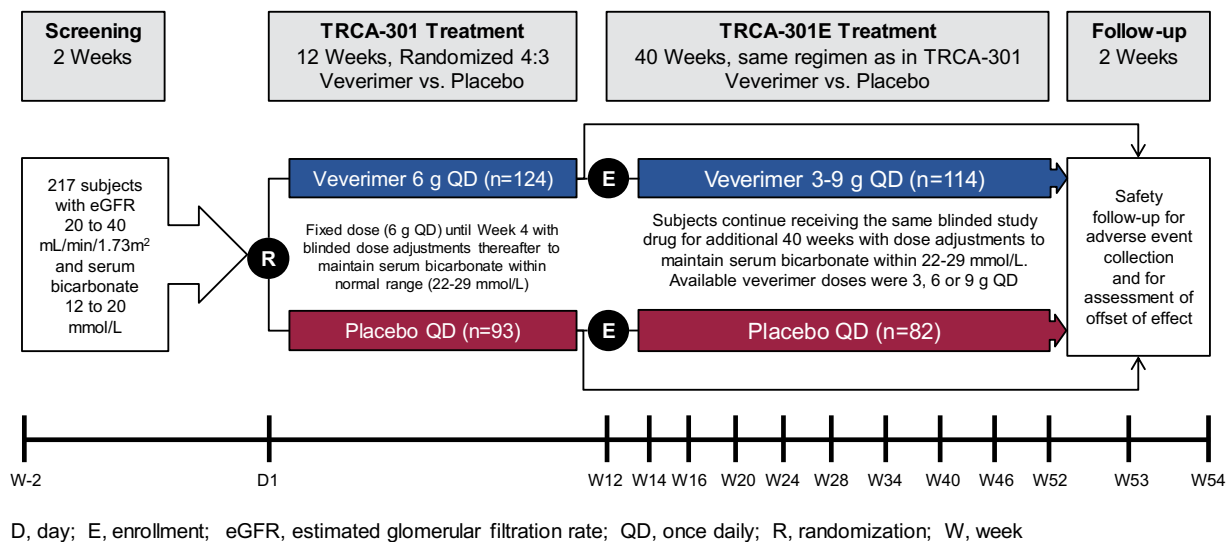

**Supplemental Figure 2. Veverimer Effect on Composite Endpoint at Treatment Week 52**

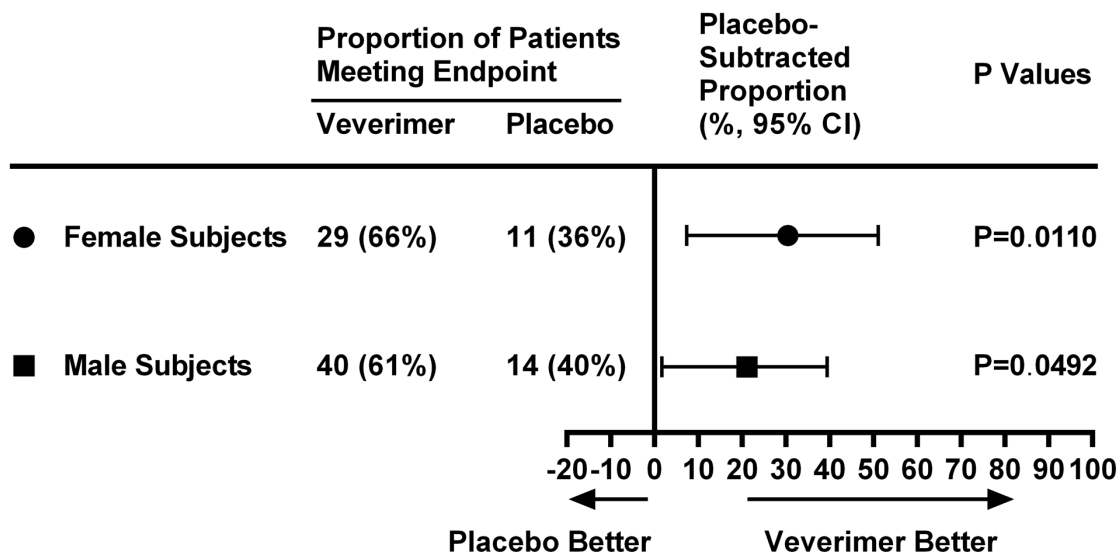

**Supplemental Table 1. Kidney Disease and Quality of Life – Physical Function Domain**

| 3. The following items are about activities you might do during a typical day.<br>Does your health now limit you in the activities? If so, how much?<br>[Mark an <input checked="" type="checkbox"/> in a box on each line.] |                                                                                                        | Yes, limited<br>a lot<br>▼          | Yes, limited<br>a little<br>▼       | No, not<br>limited at all<br>▼      |
|------------------------------------------------------------------------------------------------------------------------------------------------------------------------------------------------------------------------------|--------------------------------------------------------------------------------------------------------|-------------------------------------|-------------------------------------|-------------------------------------|
| a                                                                                                                                                                                                                            | <u>Vigorous</u> activities, such as running, lifting heavy objects, participating in strenuous sports  | <input checked="" type="checkbox"/> | <input checked="" type="checkbox"/> | <input checked="" type="checkbox"/> |
| b                                                                                                                                                                                                                            | <u>Moderate</u> activities, such as moving a table, pushing a vacuum cleaner, bowling or playing golf. | <input checked="" type="checkbox"/> | <input checked="" type="checkbox"/> | <input checked="" type="checkbox"/> |
| c                                                                                                                                                                                                                            | Lifting or carrying groceries                                                                          | <input checked="" type="checkbox"/> | <input checked="" type="checkbox"/> | <input checked="" type="checkbox"/> |
| d                                                                                                                                                                                                                            | Climbing <u>several</u> flights of stairs                                                              | <input checked="" type="checkbox"/> | <input checked="" type="checkbox"/> | <input checked="" type="checkbox"/> |
| e                                                                                                                                                                                                                            | Climbing <u>one</u> flight of stairs                                                                   | <input checked="" type="checkbox"/> | <input checked="" type="checkbox"/> | <input checked="" type="checkbox"/> |
| f                                                                                                                                                                                                                            | Bending, kneeling, or stooping                                                                         | <input checked="" type="checkbox"/> | <input checked="" type="checkbox"/> | <input checked="" type="checkbox"/> |
| g                                                                                                                                                                                                                            | Walking <u>more than a mile</u>                                                                        | <input checked="" type="checkbox"/> | <input checked="" type="checkbox"/> | <input checked="" type="checkbox"/> |
| h                                                                                                                                                                                                                            | Walking <u>several blocks</u>                                                                          | <input checked="" type="checkbox"/> | <input checked="" type="checkbox"/> | <input checked="" type="checkbox"/> |
| i                                                                                                                                                                                                                            | Walking <u>one block</u>                                                                               | <input checked="" type="checkbox"/> | <input checked="" type="checkbox"/> | <input checked="" type="checkbox"/> |
| J                                                                                                                                                                                                                            | Bathing or dressing yourself                                                                           | <input checked="" type="checkbox"/> | <input checked="" type="checkbox"/> | <input checked="" type="checkbox"/> |
